# Supplementary material for: Structural basis for GSDMB pore formation and its targeting by IpaH7.8
Source: PubMed Central journal article supplement (PMC10115629; doi:10.1038/s41586-023-05832-z), 2023-03-29
Supplement: 41586_2023_5832_MOESM1_ESM.pdf [file 41586_2023_5832_MOESM1_ESM.pdf]

## Supplementary information

---

# Structural basis for GSDMB pore formation and its targeting by IpaH7.8

---

In the format provided by the authors and unedited

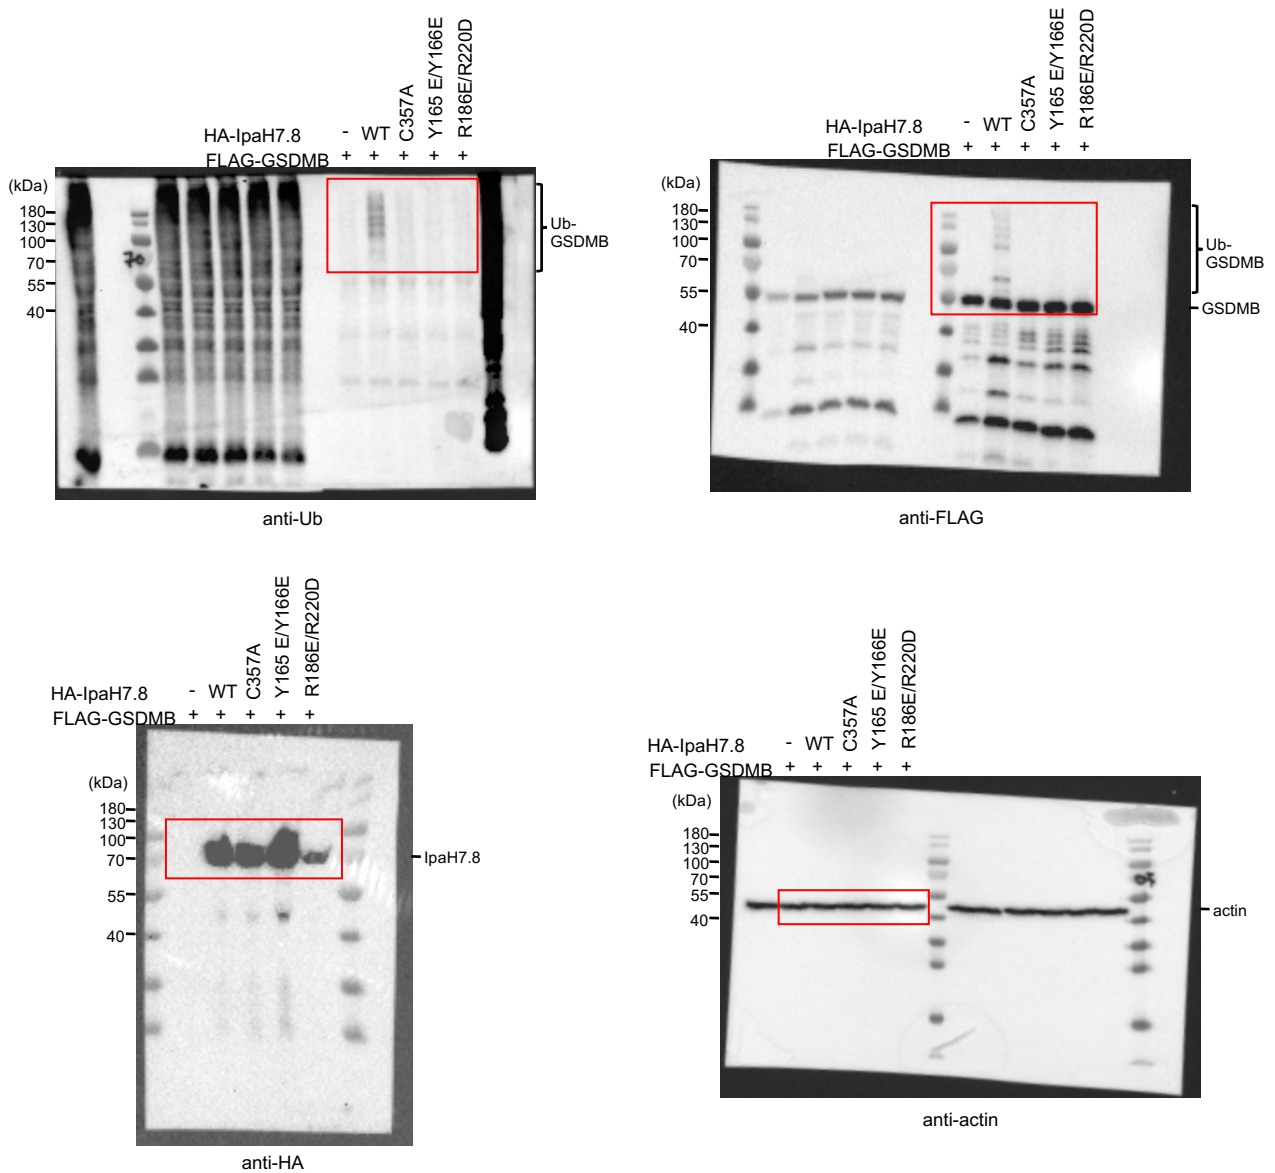

**SI Figure 1 | Uncropped immunoblots from Figure 2f.** Immunoblots for Fig. 2f showing the ubiquitination of GSDMB in HEK293T cells co-transfected with FLAG-tagged GSDMB and HA-IpaH7.8 (WT or indicated mutants). Proteins were detected by western blotting, using the indicated antibodies and the red rectangles show the cropping location.

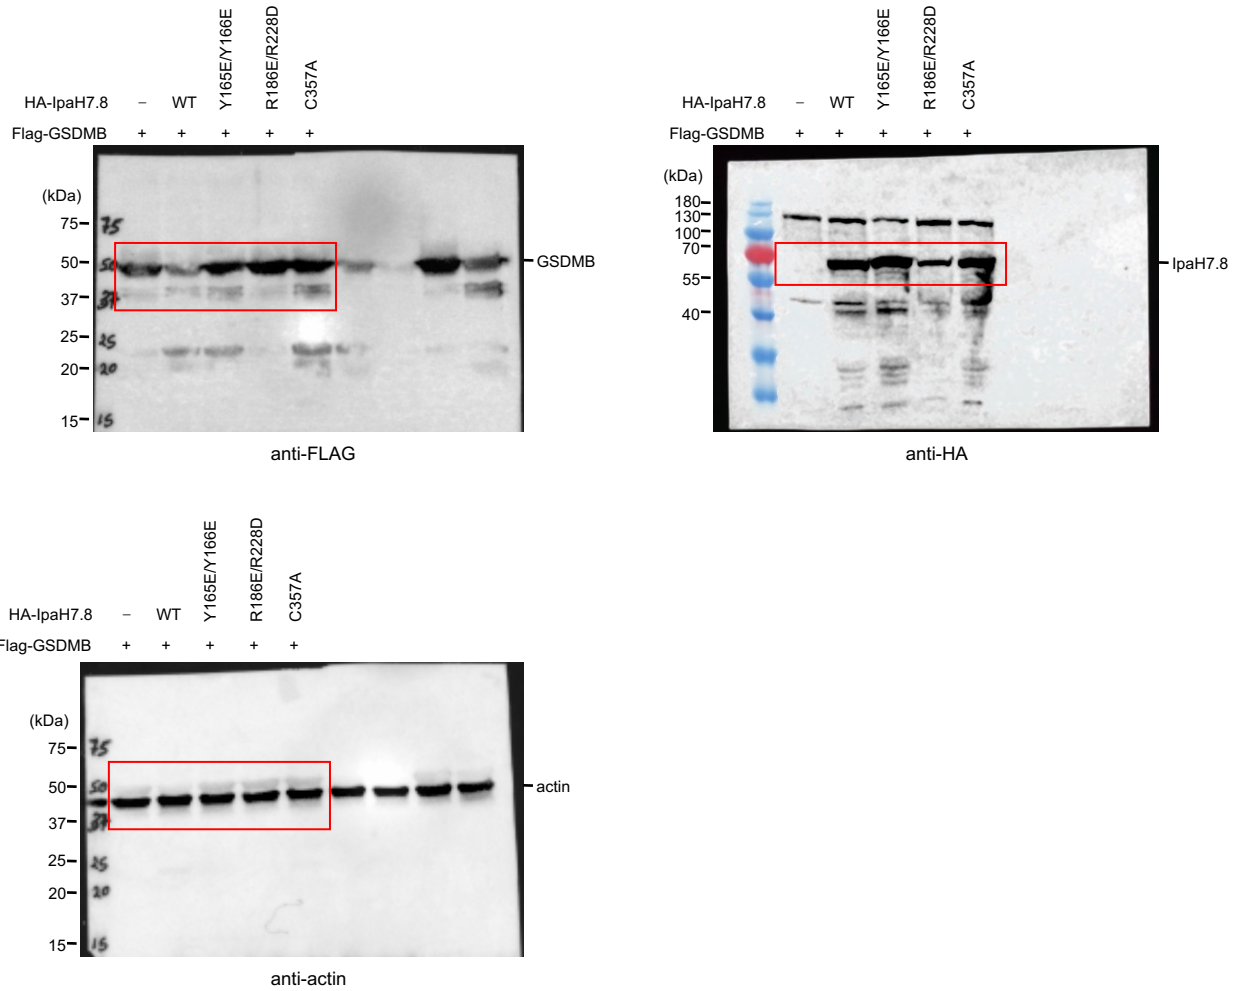

**SI Figure 2 | Uncropped immunoblots from Extended Data Fig. 3c.** Immunoblots for Extended Data Fig. 3c showing the protein level of FLAG-tagged GSDMB in 293T cells when co-transfected with HA-IpaH7.8 (WT or indicated mutants). Proteins were detected by western blotting, using the indicated antibodies and the red rectangles show the cropping location.
